# Supplementary material for: BET inhibitors drive Natural Killer activation in non-small cell lung cancer via BRD4 and SMAD3
Source: PubMed Central journal article supplement (PMC10960013; doi:10.1038/s41467-024-46778-8), 2024-03-22
Supplement: 41467_2024_46778_MOESM2_ESM.pdf [file 41467_2024_46778_MOESM2_ESM.pdf]

**Title:** Supplementary Data 1.

**Description:** Table with the clinical-pathological features of lung cancer patients included in the study.

**Title:** Supplementary Data 2.

**Description:** Table with the list of primer sequences applied in qPCR analyses.

**Title:** Supplementary Data 3.

**Description:** Table with the list of primer sequences applied in CHIP analyses.

**Title:** Supplementary video 1.

**Description:** Ex vivo co-cultures of NSCLC cells (NCI-H23) and patient-derived TILs (green-stained) in presence of vehicle or BETi (OTX015). Acquired with Incucyte system (4x magnification, scale bar 400µm).

**Title:** Supplementary video 2.

**Description:** Ex vivo co-cultures of AD patient-derived CTOS and autologous purified NK cells (red-stained) in presence of vehicle or BETi (OTX015). Acquired with Incucyte system (4x magnification, scale bar 300µm).

**Title:** Supplementary video 3.

**Description:** Co-cultures between NSCLC cells (NCI-H1299) and NK92 cells (green-stained) in presence of vehicle or BETi (OTX015). Acquired with Incucyte system (4x magnification, scale bar 400µm).

**Title:** Supplementary video 4.

**Description:** Co-cultures between NSCLC 3D spheroids (NCI-H1299) and NK92 cells (red-stained) in presence of vehicle or BETi (OTX015). Acquired with Incucyte system (4x magnification, scale bar 700µm).
